# Supplementary material for: Association between regional dietary patterns and cardiovascular health status among elderly in China
Source: Research Square preprint supplement (doi:10.21203/rs.3.rs-2328623/v1), 2023-01-18
Supplement: Supplementary file 1 [file 5b13cd3e628a280270e53f57.docx]

**Supplementary Table 1. Demographic characteristics of the subjects.**

|  | Number | Percent (%) |
| --- | --- | --- |
| Age |  |  |
| 60~69 | 2643 | 62.50 |
| 70~ | 1586 | 37.50 |
| Gender |  |  |
| male | 1976 | 46.72 |
| female | 2253 | 53.28 |
| Education |  |  |
| primary and above | 2143 | 50.67 |
| middle and high | 1580 | 37.36 |
| college and above | 506 | 11.97 |
| Income |  |  |
| low | 1410 | 33.34 |
| middle | 1409 | 33.32 |
| high | 1410 | 33.34 |
| Area |  |  |
| urban | 1584 | 37.46 |
| rural | 2645 | 62.54 |
| Total | 4229 | 100.00 |

The table includes the numbers and percentages of different demographic characteristics of the subjects.

**Supplementary Table 2. CVH metric scores of demographic characteristics of pattern 2 and pattern 3**

|  | Pattern 2 | | | | | | | | | pattern 3 | | | | | | | | |
| --- | --- | --- | --- | --- | --- | --- | --- | --- | --- | --- | --- | --- | --- | --- | --- | --- | --- | --- |
|  | BMI | non-  HDL-C | BP | Glucose | Sleep | PA | Smoke | Diet | Total | BMI | non-  HDL-C | BP | Glucose | Sleep | PA | Smoke | Diet | Total |
| Age |  |  |  |  |  |  |  |  |  |  |  |  |  |  |  |  |  |  |
| 60~69 | 78.60 | 72.90 | 41.13* | 69.47* | 86.54* | 89.52* | 77.33 | 41.82 | 69.66* | 78.36* | 67.05 | 45.94* | 63.32* | 85.26* | 87.68* | 76.21 | 35.72* | 67.44 |
| 70~ | 81.00 | 75.23 | 30.99 | 64.88 | 83.23 | 82.67 | 79.77 | 42.39 | 67.52 | 84.42 | 69.58 | 36.56 | 67.68 | 81.58 | 79.78 | 79.32 | 40.88 | 67.47 |
| Gender |  |  |  |  |  |  |  |  |  |  |  |  |  |  |  |  |  |  |
| male | 80.31 | 77.44* | 36.38 | 67.77 | 86.48* | 81.53* | 56.47* | 40.83 | 65.90* | 82.07 | 73.51* | 42.34 | 64.09 | 83.23 | 80.63 | 51.84* | 37.27 | 64.37* |
| female | 78.84 | 70.50 | 37.89 | 67.59 | 84.12 | 91.68 | 98.12 | 43.15 | 71.49 | 79.73 | 63.43 | 42.00 | 65.92 | 84.24 | 87.79 | 99.31 | 38.25 | 70.08 |
| Education |  |  |  |  |  |  |  |  |  |  |  |  |  |  |  |  |  |  |
| 0 | 79.83 | 74.12 | 36.35 | 68.91 | 82.34b | 86.58 | 80.67a | 41.00 | 68.72 | 82.37a | 68.41 | 39.33b | 66.59a | 81.96b | 85.42 | 79.94a | 38.41 | 67.81 |
| 1 | 79.51 | 73.15 | 38.07 | 67.10 | 87.69a | 86.42 | 74.56b | 42.22 | 68.59 | 78.61b | 66.93 | 44.61a | 63.64 | 86.51a | 82.03 | 71.42b | 35.52 | 66.16b |
| 2 | 78.52 | 74.43 | 37.74 | 64.70 | 89.26a | 89.00 | 79.67 | 45.41 | 69.84 | 78.31 | 70.39 | 53.18a | 59.74b | 85.84 | 88.05 | 84.74a | 42.99 | 70.41a |
| Income |  |  |  |  |  |  |  |  |  |  |  |  |  |  |  |  |  |  |
| 0 | 83.13a | 73.30 | 37.64 | 69.68 | 82.66b | 81.66b | 75.86 | 44.92a | 68.61 | 83.34a | 70.65a | 41.74 | 67.12a | 82.14b | 83.86 | 75.41 | 41.64a | 68.24 |
| 1 | 78.25b | 76.20 | 35.94 | 67.84 | 85.11 | 87.97a | 80.84 | 39.49b | 68.96 | 79.35b | 66.17b | 41.90 | 64.61 | 84.77 | 84.46 | 78.76 | 35.01b | 66.88 |
| 2 | 78.70b | 72.35 | 37.82 | 66.58 | 86.60a | 88.58a | 77.65 | 42.45 | 68.84 | 78.01b | 66.06 | 43.62 | 61.38b | 85.48a | 86.01 | 79.52 | 34.73b | 66.85 |
| Area |  |  |  |  |  |  |  |  |  |  |  |  |  |  |  |  |  |  |
| urban | 78.76 | 72.30 | 37.29 | 65.47* | 87.35* | 86.48 | 82.80* | 41.67 | 69.02 | 77.20* | 66.65 | 48.54* | 62.16* | 86.02* | 85.96* | 80.74 | 36.04 | 67.91 |
| rural | 80.03 | 74.76 | 37.10 | 69.07 | 83.91 | 87.07 | 75.43 | 42.28 | 68.71 | 82.99 | 68.93 | 38.29 | 66.85 | 82.42 | 83.60 | 75.48 | 38.86 | 67.18 |

*p<0.05; a,b,c indicates that there was statistical significance between them if they have different letters, while the same letters or no letters indicated no statistical significance.
